# Supplementary material for: Trends and forecasts of leprosy for a hyperendemic city from Brazil’s northeast: Evidence from an eleven-year time-series analysis
Source: PLoS One. 2020 Aug 7;15(8):e0237165. doi: 10.1371/journal.pone.0237165 (PMC7413479; doi:10.1371/journal.pone.0237165)
Supplement: S1 Dataset — (XLSX) [file pone.0237165.s002.xlsx]

## Sheet: Total_cases
year	Calendar_ajustment_Total_cases	Rates_Total_cases	Moving_Average_Technique_Total_cases	Calendar_ajustment_Men_cases	Rates_Men_cases	Moving_Average_Technique_Men_cases	Calendar_ajustment_Women_cases	Rates_Women_cases	Moving_Average_Technique_Women_cases
2006	42.2198	17.0581	17.0581	21.6008	18.1174	18.1174	20.619	16.0736	16.0736
2006	50.0045	20.2034	20.3545	33.6987	28.2643	23.6957	16.3058	12.7113	17.2491
2006	58.9113	23.8021	19.9975	29.4556	24.7055	23.3297	29.4556	22.9624	16.9004
2006	39.5688	15.9871	17.6267	20.2917	17.0194	17.7514	19.2771	15.0276	17.5109
2006	32.4012	13.0911	13.9286	13.746	11.5292	14.0547	18.6552	14.5428	13.8114
2006	31.4521	12.7077	13.6245	16.2333	13.6155	14.4207	15.2188	11.8639	12.8844
2006	37.3105	15.0746	15.8724	21.6008	18.1174	19.0873	15.7097	12.2466	12.8844
2006	49.0927	19.8351	15.7358	30.4375	25.529	19.6546	18.6552	14.5428	12.0935
2006	30.4375	12.2977	15.6036	18.2625	15.3174	18.2821	12.175	9.49111	13.1141
2006	36.3286	14.6779	14.3209	16.6915	13.9998	15.1619	19.6371	15.3082	13.5393
2006	39.5688	15.9871	12.9986	19.2771	16.1684	12.8011	20.2917	15.8185	13.1821
2006	20.619	8.33072	12.9986	9.81855	8.23517	12.5266	10.8004	8.41953	13.4372
2007	36.3286	14.6779	13.672	15.7097	13.1763	15.039	20.619	16.0736	12.4015
2007	44.5692	18.0074	17.2423	28.2634	23.7055	19.9801	16.3058	12.7113	14.6977
2007	47.129	19.0416	16.7222	27.4919	23.0585	20.1265	19.6371	15.3082	13.5581
2007	32.4667	13.1176	16.8025	16.2333	13.6155	19.0873	16.2333	12.6548	14.6789
2007	45.1653	18.2482	15.9209	24.5464	20.5879	17.9252	20.619	16.0736	14.0581
2007	40.5833	16.397	15.9121	23.3354	19.5723	19.4259	17.2479	13.4457	12.6463
2007	32.4012	13.0911	14.1931	21.6008	18.1174	16.6808	10.8004	8.41953	11.8809
2007	32.4012	13.0911	14.3297	14.7278	12.3528	16.9645	17.6734	13.7774	11.8809
2007	41.5979	16.8069	13.0074	24.35	20.4232	14.2194	17.2479	13.4457	11.8809
2007	22.5827	9.12412	12.333	11.7823	9.88221	13.5057	10.8004	8.41953	11.243
2007	27.3938	11.068	8.84643	12.175	10.2116	8.89399	15.2188	11.8639	8.80223
2007	15.7097	6.34722	9.63983	7.85484	6.58814	11.09	7.85484	6.12329	8.29196
2008	28.4738	11.5043	11.746	19.6371	16.4703	15.3155	8.83669	6.88871	8.42833
2008	43.0323	17.3864	12.8039	27.2888	22.8881	17.2371	15.7435	12.273	8.68346
2008	23.5645	9.52082	13.0683	14.7278	12.3528	17.4201	8.83669	6.88871	9.02365
2008	30.4375	12.2977	11.1076	20.2917	17.0194	13.3593	10.1458	7.90925	9.01485
2008	28.4738	11.5043	11.3501	12.7641	10.7057	12.9292	15.7097	12.2466	9.88232
2008	25.3646	10.2481	9.76325	13.1896	11.0626	10.5502	12.175	9.49111	9.03186
2008	18.6552	7.53732	10.16	11.7823	9.88221	12.4717	6.87298	5.35788	8.01131
2008	31.4194	12.6944	13.576	19.6371	16.4703	16.4429	11.7823	9.18494	10.9114
2008	50.7292	20.4962	16.7496	27.3938	22.9761	20.0115	23.3354	18.1913	13.7179
2008	42.2198	17.0581	16.754	24.5464	20.5879	19.0598	17.6734	13.7774	14.6109
2008	31.4521	12.7077	12.5666	16.2333	13.6155	14.9697	15.2188	11.8639	10.3331
2008	19.6371	7.93402	10.0542	12.7641	10.7057	11.1266	6.87298	5.35788	9.05737
2009	23.5645	9.52082	9.91753	10.8004	9.05869	12.3626	12.7641	9.95035	7.64501
2009	30.4375	12.2977	14.0168	20.654	17.3233	15.3821	9.78348	7.62678	12.7477
2009	50.0746	20.2318	14.5325	23.5645	19.7644	17.4684	26.5101	20.6661	11.8037
2009	27.3938	11.068	14.4002	18.2625	15.3174	16.9096	9.13125	7.11833	12.068
2009	29.4556	11.901	12.3021	18.6552	15.6468	14.0089	10.8004	8.41953	10.7158
2009	34.4958	13.9374	11.7864	13.1896	11.0626	13.0207	21.3062	16.6094	10.6392
2009	23.5645	9.52082	11.1253	14.7278	12.3528	11.6482	8.83669	6.88871	10.6392
2009	24.5464	9.91753	10.0321	13.746	11.5292	11.3645	10.8004	8.41953	8.79373
2009	26.3792	10.658	10.8255	12.175	10.2116	11.639	14.2042	11.073	10.0694
2009	29.4556	11.901	10.5258	15.7097	13.1763	12.0508	13.746	10.7158	9.1084
2009	22.3208	9.01834	8.69216	15.2188	12.7645	10.294	7.10208	5.53648	7.20337
2009	12.7641	5.15711	6.84089	5.89113	4.9411	8.37242	6.87298	5.35788	5.41741
2010	15.7097	6.34722	7.20201	8.83669	7.41165	7.76459	6.87298	5.35788	6.67913
2010	25.0022	10.1017	7.46648	13.0446	10.941	8.3136	11.9576	9.32162	6.67913
2010	14.7278	5.95052	9.04006	7.85484	6.58814	10.3815	6.87298	5.35788	7.79323
2010	27.3938	11.068	8.7142	16.2333	13.6155	10.0286	11.1604	8.70018	7.49253
2010	22.5827	9.12412	8.91696	11.7823	9.88221	10.9528	10.8004	8.41953	7.02478
2010	16.2333	6.55879	7.74008	11.1604	9.36065	9.70835	5.07292	3.95463	5.91068
2010	18.6552	7.53732	7.34338	11.7823	9.88221	9.15934	6.87298	5.35788	5.65554
2010	19.6371	7.93402	8.98307	9.81855	8.23517	10.0103	9.81855	7.65412	8.02832
2010	28.4083	11.4779	10.1732	14.2042	11.9135	12.2064	14.2042	11.073	8.28346
2010	27.4919	11.1076	11.4911	19.6371	16.4703	13.4325	7.85484	6.12329	9.68671
2010	29.4229	11.8878	11.4999	14.2042	11.9135	14.6769	15.2188	11.8639	8.5471
2010	28.4738	11.5043	9.25195	18.6552	15.6468	10.8338	9.81855	7.65412	7.78169
2011	10.8004	4.36371	7.33897	5.89113	4.9411	10.5096	4.90927	3.82706	4.39201
2011	15.2188	6.14887	6.14887	13.0446	10.941	9.68613	2.17411	1.69484	2.86118
2011	19.6371	7.93402	7.70041	15.7097	13.1763	12.0103	3.92742	3.06165	3.69463
2011	22.3208	9.01834	9.48556	14.2042	11.9135	13.3044	8.11667	6.3274	5.93619
2011	28.4738	11.5043	10.1203	17.6734	14.8233	12.8835	10.8004	8.41953	7.55206
2011	24.35	9.83819	9.62661	14.2042	11.9135	12.2064	10.1458	7.90925	7.22889
2011	18.6552	7.53732	10.8167	11.7823	9.88221	11.9318	6.87298	5.35788	9.78026
2011	37.3105	15.0746	10.6801	16.6915	13.9998	12.7828	20.619	16.0736	8.72569
2011	23.3354	9.42826	10.4156	17.2479	14.4665	12.5083	6.0875	4.74555	8.47056
2011	16.6915	6.74392	7.71363	10.8004	9.05869	10.6783	5.89113	4.59247	4.95817
2011	17.2479	6.96871	7.34778	10.1458	8.50968	9.6992	7.10208	5.53648	5.16228
2011	20.619	8.33072	8.53789	13.746	11.5292	10.7972	6.87298	5.35788	6.43796
2012	25.5282	10.3142	9.04205	14.7278	12.3528	11.1885	10.8004	8.41953	7.04707
2012	20.9914	8.48119	9.17428	11.5453	9.68343	10.0905	9.44612	7.36379	8.32275
2012	21.6008	8.72742	8.46903	9.81855	8.23517	8.80943	11.7823	9.18494	8.15266
2012	20.2917	8.19849	7.88994	10.1458	8.50968	8.60118	10.1458	7.90925	7.22889
2012	16.6915	6.74392	8.39684	10.8004	9.05869	10.3946	5.89113	4.59247	6.54002
2012	25.3646	10.2481	7.51528	16.2333	13.6155	10.0286	9.13125	7.11833	5.17929
2012	13.746	5.55381	8.17645	8.83669	7.41165	11.1266	4.90927	3.82706	5.43442
2012	21.6008	8.72742	6.53675	14.7278	12.3528	9.4247	6.87298	5.35788	3.85257
2012	13.1896	5.32902	7.33015	10.1458	8.50968	9.6992	3.04375	2.37278	5.12826
2012	19.6371	7.93402	6.74392	9.81855	8.23517	8.41818	9.81855	7.65412	5.18779
2012	17.2479	6.96871	6.81885	10.1458	8.50968	8.05217	7.10208	5.53648	5.67255
2012	13.746	5.55381	5.49651	8.83669	7.41165	6.95415	4.90927	3.82706	4.14173
2013	9.81855	3.96701	4.05202	5.89113	4.9411	5.63717	3.92742	3.06165	2.57871
2013	6.52232	2.63523	6.16776	5.43527	4.55876	8.38223	1.08705	0.84742	4.10953
2013	29.4556	11.901	7.57825	18.6552	15.6468	10.7064	10.8004	8.41953	4.67083
2013	20.2917	8.19849	8.28664	14.2042	11.9135	11.3828	6.0875	4.74555	5.40891
2013	11.7823	4.76041	7.32575	7.85484	6.58814	10.1384	3.92742	3.06165	4.71153
2013	22.3208	9.01834	8.03099	14.2042	11.9135	10.5593	8.11667	6.3274	5.68106
2013	25.5282	10.3142	8.82439	15.7097	13.1763	11.6573	9.81855	7.65412	6.19133
2013	17.6734	7.14062	9.78088	11.7823	9.88221	11.941	5.89113	4.59247	7.77318
2013	29.4229	11.8878	9.38418	15.2188	12.7645	11.6665	14.2042	11.073	7.26291
2013	22.5827	9.12412	9.0536	14.7278	12.3528	10.9253	7.85484	6.12329	7.31393
2013	15.2188	6.14887	5.8844	9.13125	7.65871	7.49401	6.0875	4.74555	4.38836
2013	5.89113	2.38021	3.76866	2.94556	2.47055	3.65093	2.94556	2.29624	3.87809
2014	6.87298	2.77691	5.08627	0.981855	0.823517	5.04894	5.89113	4.59247	5.12097
2014	25.0022	10.1017	5.48297	14.1317	11.8528	5.87246	10.8705	8.4742	5.12097
2014	8.83669	3.57031	7.15353	5.89113	4.9411	9.00183	2.94556	2.29624	5.43564
2014	19.2771	7.78856	6.29873	12.175	10.2116	8.61948	7.10208	5.53648	4.14173
2014	18.6552	7.53732	6.06512	12.7641	10.7057	8.39073	5.89113	4.59247	3.9036
2014	7.10208	2.86947	5.3202	5.07292	4.25484	7.1829	2.02917	1.58185	3.58893
2014	13.746	5.55381	5.18797	7.85484	6.58814	6.90839	5.89113	4.59247	3.58893
2014	17.6734	7.14062	7.9208	11.7823	9.88221	9.74495	5.89113	4.59247	6.22535
2014	27.3938	11.068	8.84643	15.2188	12.7645	10.294	12.175	9.49111	7.50103
2014	20.619	8.33072	8.51585	9.81855	8.23517	9.83646	10.8004	8.41953	7.28842
2014	15.2188	6.14887	6.54557	10.1458	8.50968	7.22865	5.07292	3.95463	5.91068
2014	12.7641	5.15711	9.45471	5.89113	4.9411	8.87569	6.87298	5.35788	9.99288
2015	42.2198	17.0581	9.60111	15.7097	13.1763	8.77438	26.5101	20.6661	10.3695
2015	16.3058	6.58807	11.4524	9.78348	8.20576	11.7939	6.52232	5.08452	11.1349
2015	26.5101	10.7109	7.67931	16.6915	13.9998	10.2384	9.81855	7.65412	5.30078
2015	14.2042	5.73894	8.2602	10.1458	8.50968	10.7972	4.05833	3.1637	5.90217
2015	20.619	8.33072	8.65249	11.7823	9.88221	11.2364	8.83669	6.88871	6.25086
2015	29.4229	11.8878	8.72301	18.2625	15.3174	12.5175	11.1604	8.70018	5.1963
2015	14.7278	5.95052	7.00398	14.7278	12.3528	10.5959	0	0	3.66547
2015	7.85484	3.17361	5.91085	4.90927	4.11759	8.32667	2.94556	2.29624	3.66547
2015	21.3062	8.60841	5.77861	10.1458	8.50968	5.58162	11.1604	8.70018	5.96171
2015	13.746	5.55381	6.77036	4.90927	4.11759	7.61296	8.83669	6.88871	5.98722
2015	15.2188	6.14887	7.60344	12.175	10.2116	10.8155	3.04375	2.37278	4.61798
2015	27.4919	11.1076	8.00014	21.6008	18.1174	13.0116	5.89113	4.59247	3.3423
2016	16.6915	6.74392	7.78811	12.7641	10.7057	12.8355	3.92742	3.06165	3.09684
2016	13.6444	5.51278	6.86247	11.5453	9.68343	10.0905	2.09914	1.6364	3.86225
2016	20.619	8.33072	8.16718	11.7823	9.88221	9.64209	8.83669	6.88871	6.79633
2016	26.3792	10.658	8.84202	11.1604	9.36065	9.98286	15.2188	11.8639	7.78169
2016	18.6552	7.53732	8.25138	12.7641	10.7057	9.24169	5.89113	4.59247	7.33094
2016	16.2333	6.55879	6.15327	9.13125	7.65871	7.49401	7.10208	5.53648	4.90714
2016	10.8004	4.36371	5.49211	4.90927	4.11759	6.39598	5.89113	4.59247	4.652
2016	13.746	5.55381	6.72188	8.83669	7.41165	8.09792	4.90927	3.82706	5.44293
2016	25.3646	10.2481	7.38305	15.2188	12.7645	9.19594	10.1458	7.90925	5.69806
2016	15.7097	6.34722	7.30811	8.83669	7.41165	8.42733	6.87298	5.35788	6.26787
2016	13.1896	5.32902	5.61112	6.0875	5.10581	5.81952	7.10208	5.53648	5.41741
2016	12.7641	5.15711	5.24307	5.89113	4.9411	5.02345	6.87298	5.35788	5.44718

## Sheet: Men_group_age
year	Calendar_ajustment_Men<15.yo	Rates_Men<15.yo	Moving_Average_Technique_Men<15.yo	Calendar_ajustment_Men_15-29.yo	Rates_Men_15-29.yo	Moving_Average_Technique_Men_15-29.yo	Calendar_ajustment_Men_30-59.yo	Rates_Men_30-59.yo	Moving_Average_Technique_Men_30-59.yo	Calendar_ajustment_Men≥60.yo	Rates_Men≥60.yo	Moving_Average_Technique_Men≥60.yo
2006	3.92742	11.6292	11.6292	5.89113	16.3911	16.3911	6.87298	17.0834	17.0834	4.90927	52.8903	52.8903
2006	3.26116	9.6564	10.0025	7.60938	21.1719	18.8953	17.3929	43.2314	30.6803	5.43527	58.5571	61.8312
2006	2.94556	8.72191	8.12892	6.87298	19.123	19.0774	12.7641	31.7263	30.8702	6.87298	74.0464	62.4189
2006	2.02917	6.00843	5.87922	6.0875	16.9375	16.5732	7.10208	17.6528	21.3407	5.07292	54.6533	49.9519
2006	0.981855	2.9073	4.97472	4.90927	13.6593	14.9038	5.89113	14.6429	15.8089	1.96371	21.1561	36.2004
2006	2.02917	6.00843	3.94101	5.07292	14.1146	14.7216	6.0875	15.131	18.8731	3.04375	32.792	32.0868
2006	0.981855	2.9073	6.84832	5.89113	16.3911	17.4535	10.8004	26.8453	26.1945	3.92742	42.3122	39.1388
2006	3.92742	11.6292	7.84972	7.85484	21.8548	18.3945	14.7278	36.6072	25.3539	3.92742	42.3122	42.7823
2006	3.04375	9.01264	8.81882	6.0875	16.9375	19.3051	5.07292	12.6092	21.2864	4.05833	43.7226	35.7303
2006	1.96371	5.81461	7.94663	6.87298	19.123	15.784	5.89113	14.6429	17.4901	1.96371	21.1561	28.9133
2006	3.04375	9.01264	5.91152	4.05833	11.2917	12.8701	10.1458	25.2183	15.7276	2.02917	21.8613	24.9172
2006	0.981855	2.9073	4.94242	2.94556	8.19556	10.1382	2.94556	7.32145	15.7276	2.94556	31.7342	35.4952
2007	0.981855	2.9073	4.08407	3.92742	10.9274	10.4071	5.89113	14.6429	19.03	4.90927	52.8903	55.5348
2007	2.17411	6.4376	6.99137	4.34821	12.0982	17.692	14.1317	35.1255	23.9109	7.60938	81.9799	59.0608
2007	3.92742	11.6292	8.02508	10.8004	30.0504	17.8134	8.83669	21.9643	25.7548	3.92742	42.3122	48.7178
2007	2.02917	6.00843	9.75562	4.05833	11.2917	19.2444	8.11667	20.1747	24.6218	2.02917	21.8613	28.4432
2007	3.92742	11.6292	5.87922	5.89113	16.3911	17.6963	12.7641	31.7263	24.8658	1.96371	21.1561	32.5569
2007	0	0	7.75281	9.13125	25.4062	18.4855	9.13125	22.6965	25.4624	5.07292	54.6533	39.3739
2007	3.92742	11.6292	7.75281	4.90927	13.6593	15.7537	8.83669	21.9643	20.5814	3.92742	42.3122	35.8478
2007	3.92742	11.6292	7.75281	2.94556	8.19556	16.6946	6.87298	17.0834	19.7408	0.981855	10.5781	39.4914
2007	0	0	3.87641	10.1458	28.2291	17.6053	8.11667	20.1747	17.3003	6.0875	65.5839	25.3873
2007	0	0	2.00281	5.89113	16.3911	18.6373	5.89113	14.6429	14.9683	0	0	29.1484
2007	2.02917	6.00843	2.97191	4.05833	11.2917	9.22759	4.05833	10.0873	12.3109	2.02917	21.8613	14.3391
2007	0.981855	2.9073	6.84832	0	0	8.31697	4.90927	12.2024	14.7514	1.96371	21.1561	21.3912
2008	3.92742	11.6292	6.91738	4.90927	13.6593	14.2873	8.83669	21.9643	21.8241	1.96371	21.1561	21.6425
2008	2.09914	6.21562	5.94828	10.4957	29.2026	17.0191	12.5948	31.3055	25.8916	2.09914	22.6151	21.6425
2008	0	0	4.07468	2.94556	8.19556	16.2299	9.81855	24.4048	27.8168	1.96371	21.1561	25.5211
2008	2.02917	6.00843	2.97191	4.05833	11.2917	11.0488	11.1604	27.7401	21.4491	3.04375	32.792	25.0347
2008	0.981855	2.9073	2.97191	4.90927	13.6593	12.0809	4.90927	12.2024	19.1985	1.96371	21.1561	25.2698
2008	0	0	1.9382	4.05833	11.2917	9.22759	7.10208	17.6528	18.0867	2.02917	21.8613	14.3391
2008	0.981855	2.9073	3.87641	0.981855	2.73185	8.31697	9.81855	24.4048	21.3407	0	0	21.3912
2008	2.94556	8.72191	5.87922	3.92742	10.9274	8.31697	8.83669	21.9643	28.9062	3.92742	42.3122	32.3218
2008	2.02917	6.00843	7.81742	4.05833	11.2917	11.0488	16.2333	40.3493	32.1601	5.07292	54.6533	46.4259
2008	2.94556	8.72191	5.91152	3.92742	10.9274	11.1702	13.746	34.1668	32.4042	3.92742	42.3122	39.6089
2008	1.01458	3.00421	3.90871	4.05833	11.2917	11.0488	9.13125	22.6965	23.8354	2.02917	21.8613	31.9692
2008	0	0	3.90871	3.92742	10.9274	9.22759	5.89113	14.6429	16.5139	2.94556	31.7342	21.3912
2009	2.94556	8.72191	5.05317	1.96371	5.4637	11.5128	4.90927	12.2024	14.3524	0.981855	10.5781	33.6231
2009	2.17411	6.4376	8.92958	6.52232	18.1473	11.5128	6.52232	16.2118	18.4198	5.43527	58.5571	40.6751
2009	3.92742	11.6292	9.02649	3.92742	10.9274	15.3374	10.8004	26.8453	19.396	4.90927	52.8903	48.0798
2009	3.04375	9.01264	10.757	6.0875	16.9375	11.1095	6.0875	15.131	21.3135	3.04375	32.792	42.6648
2009	3.92742	11.6292	9.88483	1.96371	5.4637	8.40803	8.83669	21.9643	18.2494	3.92742	42.3122	32.3218
2009	3.04375	9.01264	8.81882	1.01458	2.82291	3.67282	7.10208	17.6528	20.5272	2.02917	21.8613	31.9692
2009	1.96371	5.81461	5.91152	0.981855	2.73185	5.49406	8.83669	21.9643	18.0867	2.94556	31.7342	28.4432
2009	0.981855	2.9073	3.90871	3.92742	10.9274	5.49406	5.89113	14.6429	18.9273	2.94556	31.7342	28.4432
2009	1.01458	3.00421	2.93961	1.01458	2.82291	5.49406	8.11667	20.1747	20.5543	2.02917	21.8613	28.4432
2009	0.981855	2.9073	1.97051	0.981855	2.73185	10.3203	10.8004	26.8453	19.8764	2.94556	31.7342	21.5087
2009	0	0	0.969101	9.13125	25.4062	11.2006	5.07292	12.6092	15.592	1.01458	10.9307	17.7476
2009	0	0	1.9382	1.96371	5.4637	11.2006	2.94556	7.32145	9.89751	0.981855	10.5781	14.2216
2010	1.96371	5.81461	1.9382	0.981855	2.73185	5.7564	3.92742	9.76193	10.1977	1.96371	21.1561	26.1933
2010	0	0	1.9382	3.26116	9.07365	7.57764	5.43527	13.5098	11.0112	4.34821	46.8457	22.6673
2010	0	0	0	3.92742	10.9274	11.3719	3.92742	9.76193	15.3227	0	0	22.9023
2010	0	0	0	5.07292	14.1146	10.1686	9.13125	22.6965	18.1409	2.02917	21.8613	10.8131
2010	0	0	0	1.96371	5.4637	11.2309	8.83669	21.9643	19.09	0.981855	10.5781	14.4567
2010	0	0	0	5.07292	14.1146	11.0792	5.07292	12.6092	15.592	1.01458	10.9307	14.2216
2010	0	0	0.969101	4.90927	13.6593	10.1686	4.90927	12.2024	13.1515	1.96371	21.1561	17.7476
2010	0.981855	2.9073	1.97051	0.981855	2.73185	10.1686	5.89113	14.6429	12.3109	1.96371	21.1561	28.6783
2010	1.01458	3.00421	3.90871	5.07292	14.1146	10.1686	4.05833	10.0873	14.7514	4.05833	43.7226	39.2563
2010	1.96371	5.81461	3.94101	4.90927	13.6593	13.0218	7.85484	19.5239	14.9141	4.90927	52.8903	43.1349
2010	1.01458	3.00421	4.87781	4.05833	11.2917	13.7807	6.0875	15.131	15.6191	3.04375	32.792	49.7168
2010	1.96371	5.81461	2.93961	5.89113	16.3911	10.1382	4.90927	12.2024	10.7381	5.89113	63.4683	42.6648
2011	0	0	4.08407	0.981855	2.73185	9.39887	1.96371	4.88096	10.1977	2.94556	31.7342	39.5418
2011	2.17411	6.4376	2.14587	3.26116	9.07365	6.66702	5.43527	13.5098	11.8247	2.17411	23.4228	39.5418
2011	0	0	2.14587	2.94556	8.19556	7.63834	6.87298	17.0834	16.082	5.89113	63.4683	47.1815
2011	0	0	0.969101	2.02917	5.64583	8.25626	7.10208	17.6528	18.0867	5.07292	54.6533	57.0039
2011	0.981855	2.9073	1.97051	3.92742	10.9274	8.34732	7.85484	19.5239	19.1171	4.90927	52.8903	43.1349
2011	1.01458	3.00421	5.84691	3.04375	8.46874	8.28662	8.11667	20.1747	15.6733	2.02917	21.8613	35.4952
2011	3.92742	11.6292	5.84691	1.96371	5.4637	4.64415	2.94556	7.32145	18.1138	2.94556	31.7342	35.4952
2011	0.981855	2.9073	4.84551	0	0	5.58512	10.8004	26.8453	19.795	4.90927	52.8903	39.1388
2011	0	0	0.969101	4.05833	11.2917	8.31697	10.1458	25.2183	20.6085	3.04375	32.792	35.6128
2011	0	0	1.0014	4.90927	13.6593	8.31697	3.92742	9.76193	18.385	1.96371	21.1561	21.6262
2011	1.01458	3.00421	2.93961	0	0	5.4637	8.11667	20.1747	14.8598	1.01458	10.9307	28.3257
2011	1.96371	5.81461	2.93961	0.981855	2.73185	2.73185	5.89113	14.6429	18.1138	4.90927	52.8903	38.9037
2012	0	0	2.97414	1.96371	5.4637	3.70527	7.85484	19.5239	16.6065	4.90927	52.8903	46.5677
2012	1.04957	3.10781	2.00504	1.04957	2.92026	2.79465	6.29741	15.6527	17.42	3.14871	33.9227	35.9897
2012	0.981855	2.9073	3.00644	0	0	1.91439	6.87298	17.0834	15.9557	1.96371	21.1561	25.6467
2012	1.01458	3.00421	2.93961	1.01458	2.82291	3.67282	6.0875	15.131	13.1786	2.02917	21.8613	28.4432
2012	0.981855	2.9073	1.97051	2.94556	8.19556	5.55477	2.94556	7.32145	16.7309	3.92742	42.3122	32.3218
2012	0	0	1.9382	2.02917	5.64583	6.43503	11.1604	27.7401	15.7547	3.04375	32.792	28.5607
2012	0.981855	2.9073	0.969101	1.96371	5.4637	6.43503	4.90927	12.2024	19.0086	0.981855	10.5781	32.0868
2012	0	0	0.969101	2.94556	8.19556	6.43503	6.87298	17.0834	15.6462	4.90927	52.8903	24.7997
2012	0	0	0	2.02917	5.64583	4.61379	7.10208	17.6528	14.8327	1.01458	10.9307	42.4297
2012	0	0	1.0014	0	0	2.82291	3.92742	9.76193	11.6601	5.89113	63.4683	43.0174
2012	1.01458	3.00421	1.97051	1.01458	2.82291	1.85159	3.04375	7.5655	10.6568	5.07292	54.6533	42.8999
2012	0.981855	2.9073	1.97051	0.981855	2.73185	5.49406	5.89113	14.6429	8.21629	0.981855	10.5781	25.2698
2013	0	0	0.969101	3.92742	10.9274	4.55309	0.981855	2.44048	10.1977	0.981855	10.5781	7.05204
2013	0	0	0.969101	0	0	7.28494	5.43527	13.5098	13.4517	0	0	17.6301
2013	0.981855	2.9073	0.969101	3.92742	10.9274	6.46538	9.81855	24.4048	20.2037	3.92742	42.3122	21.3912
2013	0	0	1.9382	3.04375	8.46874	7.376	9.13125	22.6965	18.9544	2.02917	21.8613	28.4432
2013	0.981855	2.9073	0.969101	0.981855	2.73185	5.61547	3.92742	9.76193	19.2256	1.96371	21.1561	21.6262
2013	0	0	3.87641	2.02917	5.64583	5.52441	10.1458	25.2183	15.7276	2.02917	21.8613	31.9692
2013	2.94556	8.72191	2.9073	2.94556	8.19556	6.43503	4.90927	12.2024	18.168	4.90927	52.8903	35.4952
2013	0	0	3.90871	1.96371	5.4637	6.43503	6.87298	17.0834	18.168	2.94556	31.7342	35.4952
2013	1.01458	3.00421	1.0014	2.02917	5.64583	6.43503	10.1458	25.2183	21.422	2.02917	21.8613	28.4432
2013	0	0	1.0014	2.94556	8.19556	8.37768	8.83669	21.9643	17.4088	2.94556	31.7342	28.7958
2013	0	0	0	4.05833	11.2917	7.40635	2.02917	5.04366	10.6297	3.04375	32.792	21.5087
2013	0	0	0	0.981855	2.73185	4.6745	1.96371	4.88096	4.1217	0	0	10.9307
2014	0	0	0	0	0	2.92698	0.981855	2.44048	10.5464	0	0	7.80761
2014	0	0	0	2.17411	6.0491	2.92698	9.78348	24.3177	10.5464	2.17411	23.4228	18.3857
2014	0	0	0	0.981855	2.73185	5.7499	1.96371	4.88096	13.9359	2.94556	31.7342	32.9599
2014	0	0	1.9382	3.04375	8.46874	6.46538	5.07292	12.6092	11.5245	4.05833	43.7226	28.6783
2014	1.96371	5.81461	1.9382	2.94556	8.19556	6.49574	6.87298	17.0834	12.4193	0.981855	10.5781	21.7438
2014	0	0	1.9382	1.01458	2.82291	6.40467	3.04375	7.5655	11.4703	1.01458	10.9307	10.6956
2014	0	0	0.969101	2.94556	8.19556	7.31529	3.92742	9.76193	10.6568	0.981855	10.5781	10.6956
2014	0.981855	2.9073	4.97472	3.92742	10.9274	6.37432	5.89113	14.6429	15.7004	0.981855	10.5781	14.3391
2014	4.05833	12.0169	5.94382	0	0	6.37432	9.13125	22.6965	16.5139	2.02917	21.8613	14.3391
2014	0.981855	2.9073	4.97472	2.94556	8.19556	5.55477	4.90927	12.2024	14.9954	0.981855	10.5781	21.7438
2014	0	0	0.969101	3.04375	8.46874	6.46538	4.05833	10.0873	9.8704	3.04375	32.792	21.5087
2014	0	0	2.9073	0.981855	2.73185	8.28662	2.94556	7.32145	10.6839	1.96371	21.1561	25.0347
2015	2.94556	8.72191	2.9073	4.90927	13.6593	8.48825	5.89113	14.6429	10.9241	1.96371	21.1561	21.9117
2015	0	0	4.84551	3.26116	9.07365	8.48825	4.34821	10.8079	15.805	2.17411	23.4228	32.4897
2015	1.96371	5.81461	1.9382	0.981855	2.73185	4.87614	8.83669	21.9643	16.8083	4.90927	52.8903	32.7248
2015	0	0	1.9382	1.01458	2.82291	4.58344	7.10208	17.6528	20.5272	2.02917	21.8613	24.9172
2015	0	0	2.00281	2.94556	8.19556	9.31865	8.83669	21.9643	18.2494	0	0	21.8613
2015	2.02917	6.00843	2.97191	6.0875	16.9375	13.8414	6.0875	15.131	16.4326	4.05833	43.7226	25.1523
2015	0.981855	2.9073	3.94101	5.89113	16.3911	11.1095	4.90927	12.2024	9.92463	2.94556	31.7342	35.7303
2015	0.981855	2.9073	2.93961	0	0	8.28662	0.981855	2.44048	7.4028	2.94556	31.7342	32.0868
2015	1.01458	3.00421	2.93961	3.04375	8.46874	2.82291	3.04375	7.5655	5.77581	3.04375	32.792	25.0347
2015	0.981855	2.9073	1.97051	0	0	6.5868	2.94556	7.32145	7.48415	0.981855	10.5781	32.6744
2015	0	0	3.87641	4.05833	11.2917	7.40635	3.04375	7.5655	14.7242	5.07292	54.6533	32.3218
2015	2.94556	8.72191	3.87641	3.92742	10.9274	10.1382	11.7823	29.2858	18.7917	2.94556	31.7342	32.3218
2016	0.981855	2.9073	5.94828	2.94556	8.19556	8.32116	7.85484	19.5239	20.6179	0.981855	10.5781	21.6425
2016	2.09914	6.21562	3.04097	2.09914	5.84051	6.49992	5.24784	13.044	15.7369	2.09914	22.6151	25.1685
2016	0	0	2.07187	1.96371	5.4637	5.65001	5.89113	14.6429	15.1132	3.92742	42.3122	28.9296
2016	0	0	0	2.02917	5.64583	5.52441	7.10208	17.6528	17.2732	2.02917	21.8613	31.9692
2016	0	0	1.0014	1.96371	5.4637	4.64415	7.85484	19.5239	14.9141	2.94556	31.7342	32.4394
2016	1.01458	3.00421	1.0014	1.01458	2.82291	3.67282	3.04375	7.5655	12.2838	4.05833	43.7226	25.1523
2016	0	0	2.93961	0.981855	2.73185	4.58344	3.92742	9.76193	7.4028	0	0	21.6262
2016	1.96371	5.81461	4.94242	2.94556	8.19556	6.46538	1.96371	4.88096	11.6058	1.96371	21.1561	10.6956
2016	3.04375	9.01264	4.94242	3.04375	8.46874	6.46538	8.11667	20.1747	14.0463	1.01458	10.9307	14.2216
2016	0	0	4.00562	0.981855	2.73185	3.73353	6.87298	17.0834	15.7818	0.981855	10.5781	10.8131
2016	1.01458	3.00421	2.93961	0	0	1.82123	4.05833	10.0873	10.6839	1.01458	10.9307	10.6956
2016	1.96371	5.81461	4.40941	0.981855	2.73185	1.36593	1.96371	4.88096	7.48415	0.981855	10.5781	10.7544

## Sheet: Women_group_age
year	Calendar_ajustment_Women<15.yo	Rates_Women<15.yo	Moving_Average_Technique_Women<15.yo	Calendar_ajustment_Women_15-29.yo	Rates_Women_15-29.yo	Moving_Average_Technique_Women_15-29.yo	Calendar_ajustment_Women_30-59.yo	Rates_Women_30-59.yo	Moving_Average_Technique_Women_30-59.yo	Calendar_ajustment_Women≥60.yo	Rates_Women≥60.yo	Moving_Average_Technique_Women≥60.yo
2006	4.90927	14.8487	14.8487	5.89113	15.1712	15.1712	8.83669	19.5114	19.5114	0.981855	8.84953	8.84953
2006	1.08705	3.28792	10.0052	5.43527	13.9972	20.6798	7.60938	16.8014	17.8854	2.17411	19.5954	24.2308
2006	3.92742	11.879	5.05563	12.7641	32.8709	19.1065	7.85484	17.3434	19.5957	4.90927	44.2476	33.4737
2006	0	0	7.9193	4.05833	10.4513	22.0263	11.1604	24.6421	16.8858	4.05833	36.578	32.8416
2006	3.92742	11.879	8.05129	8.83669	22.7568	13.6822	3.92742	8.67171	15.585	1.96371	17.6991	24.1887
2006	4.05833	12.2749	12.0109	3.04375	7.83845	11.8841	6.0875	13.4412	14.5974	2.02917	18.289	11.996
2006	3.92742	11.879	9.0412	1.96371	5.05707	8.51273	9.81855	21.6793	20.3785	0	0	9.04618
2006	0.981855	2.96974	6.99538	4.90927	12.6427	10.2546	11.7823	26.0151	18.8851	0.981855	8.84953	5.99801
2006	2.02917	6.13746	3.03573	5.07292	13.0641	14.4688	4.05833	8.96077	19.6077	1.01458	9.14451	11.8977
2006	0	0	4.09164	6.87298	17.6997	15.4802	10.8004	23.8472	17.6566	1.96371	17.6991	18.0924
2006	2.02917	6.13746	4.02565	6.0875	15.6769	12.8112	9.13125	20.1617	18.2829	3.04375	27.4335	20.9439
2006	1.96371	5.93948	6.00547	1.96371	5.05707	12.8112	4.90927	10.8396	19.0055	1.96371	17.6991	15.0442
2007	1.96371	5.93948	5.05563	6.87298	17.6997	10.385	11.7823	26.0151	18.6855	0	0	15.6974
2007	1.08705	3.28792	6.04554	3.26116	8.39834	11.2279	8.69643	19.2017	23.0213	3.26116	29.3931	18.6472
2007	2.94556	8.90921	5.08862	2.94556	7.5856	7.9408	10.8004	23.8472	21.0702	2.94556	26.5486	27.7917
2007	1.01458	3.06873	4.98256	3.04375	7.83845	11.8841	9.13125	20.1617	21.8961	3.04375	27.4335	23.8937
2007	0.981855	2.96974	5.08155	7.85484	20.2283	13.7103	9.81855	21.6793	19.1741	1.96371	17.6991	21.1405
2007	3.04375	9.20619	4.05864	5.07292	13.0641	16.1545	7.10208	15.6813	16.0668	2.02917	18.289	11.996
2007	0	0	5.04855	5.89113	15.1712	13.626	4.90927	10.8396	16.0668	0	0	9.04618
2007	1.96371	5.93948	4.02565	4.90927	12.6427	11.8841	9.81855	21.6793	18.307	0.981855	8.84953	9.04618
2007	2.02917	6.13746	6.99538	3.04375	7.83845	9.35557	10.1458	22.4019	16.139	2.02917	18.289	17.8957
2007	2.94556	8.90921	8.08429	2.94556	7.5856	10.367	1.96371	4.33586	11.8995	2.94556	26.5486	21.0422
2007	3.04375	9.20619	6.03847	6.0875	15.6769	9.43986	4.05833	8.96077	8.76807	2.02917	18.289	14.9459
2007	0	0	3.06873	1.96371	5.05707	8.59701	5.89113	13.0076	11.6586	0	0	9.04618
2008	0	0	3.17455	1.96371	5.05707	7.87624	5.89113	13.0076	13.3066	0.981855	8.84953	6.10312
2008	3.14871	9.52364	3.17455	5.24784	13.5146	6.19055	6.29741	13.9046	14.0292	1.04957	9.45984	12.0028
2008	0	0	5.22037	0	0	5.3758	6.87298	15.1755	14.1738	1.96371	17.6991	12.1011
2008	2.02917	6.13746	3.03573	1.01458	2.61282	5.92801	6.0875	13.4412	15.32	1.01458	9.14451	11.8977
2008	0.981855	2.96974	3.03573	5.89113	15.1712	8.54082	7.85484	17.3434	16.9821	0.981855	8.84953	5.99801
2008	0	0	0.989913	3.04375	7.83845	10.1984	9.13125	20.1617	13.947	0	0	8.84953
2008	0	0	1.97983	2.94556	7.5856	9.35557	1.96371	4.33586	11.0564	1.96371	17.6991	8.84953
2008	1.96371	5.93948	3.00274	4.90927	12.6427	14.5812	3.92742	8.67171	11.8032	0.981855	8.84953	17.994
2008	1.01458	3.06873	4.98256	9.13125	23.5154	16.2669	10.1458	22.4019	15.4164	3.04375	27.4335	23.8937
2008	1.96371	5.93948	4.02565	4.90927	12.6427	17.2783	6.87298	15.1755	15.5127	3.92742	35.3981	33.1366
2008	1.01458	3.06873	4.98256	6.0875	15.6769	11.1255	4.05833	8.96077	10.2134	4.05833	36.578	23.992
2008	1.96371	5.93948	3.99265	1.96371	5.05707	11.1255	2.94556	6.50379	9.49071	0	0	15.1425
2009	0.981855	2.96974	2.96974	4.90927	12.6427	10.5657	5.89113	13.0076	8.90399	0.981855	8.84953	6.21574
2009	0	0	2.96974	5.43527	13.9972	15.6227	3.26116	7.20062	13.9625	1.08705	9.79769	26.8646
2009	1.96371	5.93948	4.02565	7.85484	20.2283	13.1504	9.81855	21.6793	12.6136	6.87298	61.9467	26.963
2009	2.02917	6.13746	5.01556	2.02917	5.22564	11.856	4.05833	8.96077	12.3813	1.01458	9.14451	32.5466
2009	0.981855	2.96974	3.03573	3.92742	10.1141	11.2098	2.94556	6.50379	14.8624	2.94556	26.5486	14.9459
2009	0	0	0.989913	7.10208	18.2897	10.3108	13.1896	29.1225	16.9339	1.01458	9.14451	14.8475
2009	0	0	0.989913	0.981855	2.52853	8.62511	6.87298	15.1755	17.6566	0.981855	8.84953	17.7974
2009	0.981855	2.96974	2.01282	1.96371	5.05707	5.14135	3.92742	8.67171	13.1762	3.92742	35.3981	23.8937
2009	1.01458	3.06873	3.00274	3.04375	7.83845	6.82704	7.10208	15.6813	13.1762	3.04375	27.4335	29.7934
2009	0.981855	2.96974	3.03573	2.94556	7.5856	6.88323	6.87298	15.1755	13.2725	2.94556	26.5486	17.994
2009	1.01458	3.06873	2.01282	2.02917	5.22564	5.11326	4.05833	8.96077	10.936	0	0	14.7492
2009	0	0	1.02291	0.981855	2.52853	4.27041	3.92742	8.67171	8.04542	1.96371	17.6991	11.7994
2010	0	0	1.09597	1.96371	5.05707	5.32798	2.94556	6.50379	10.659	1.96371	17.6991	11.7994
2010	1.08705	3.28792	1.09597	3.26116	8.39834	4.48514	7.60938	16.8014	11.3816	0	0	11.7994
2010	0	0	2.11888	0	0	3.67039	4.90927	10.8396	15.1875	1.96371	17.6991	8.94785
2010	1.01458	3.06873	1.02291	1.01458	2.61282	3.39947	8.11667	17.9215	13.9229	1.01458	9.14451	14.8475
2010	0	0	1.02291	2.94556	7.5856	5.14135	5.89113	13.0076	11.8032	1.96371	17.6991	11.996
2010	0	0	0.989913	2.02917	5.22564	6.79895	2.02917	4.48039	7.2746	1.01458	9.14451	11.8977
2010	0.981855	2.96974	2.96974	2.94556	7.5856	5.11326	1.96371	4.33586	7.2746	0.981855	8.84953	8.94785
2010	1.96371	5.93948	5.01556	0.981855	2.52853	9.46795	5.89113	13.0076	9.5148	0.981855	8.84953	5.89968
2010	2.02917	6.13746	5.01556	7.10208	18.2897	8.62511	5.07292	11.201	11.6827	0	0	2.94984
2010	0.981855	2.96974	5.08155	1.96371	5.05707	9.52414	4.90927	10.8396	14.8142	0	0	3.04817
2010	2.02917	6.13746	4.02565	2.02917	5.22564	4.27041	10.1458	22.4019	15.4164	1.01458	9.14451	8.94785
2010	0.981855	2.96974	4.02565	0.981855	2.52853	2.58472	5.89113	13.0076	13.9711	1.96371	17.6991	11.8977
2011	0.981855	2.96974	1.97983	0	0	1.77599	2.94556	6.50379	7.30385	0.981855	8.84953	8.84953
2011	0	0	0.989913	1.08705	2.79945	1.77599	1.08705	2.40021	4.41328	0	0	5.89968
2011	0	0	1.02291	0.981855	2.52853	2.64693	1.96371	4.33586	5.23228	0.981855	8.84953	9.04618
2011	1.01458	3.06873	3.00274	1.01458	2.61282	3.39947	4.05833	8.96077	9.49071	2.02917	18.289	9.04618
2011	1.96371	5.93948	6.07146	1.96371	5.05707	3.42757	6.87298	15.1755	12.5258	0	0	6.09634
2011	3.04375	9.20619	7.02838	1.01458	2.61282	4.24232	6.0875	13.4412	11.7068	0	0	0
2011	1.96371	5.93948	7.02838	1.96371	5.05707	5.92801	2.94556	6.50379	13.1521	0	0	17.6991
2011	1.96371	5.93948	6.00547	3.92742	10.1141	6.79895	8.83669	19.5114	9.41845	5.89113	53.0972	20.7472
2011	2.02917	6.13746	5.01556	2.02917	5.22564	5.9561	1.01458	2.24019	8.6958	1.01458	9.14451	26.6469
2011	0.981855	2.96974	3.03573	0.981855	2.52853	2.58472	1.96371	4.33586	5.92567	1.96371	17.6991	15.0442
2011	0	0	2.96974	0	0	2.52853	5.07292	11.201	7.34687	2.02917	18.289	11.996
2011	1.96371	5.93948	1.97983	1.96371	5.05707	3.37138	2.94556	6.50379	11.6827	0	0	9.04618
2012	0	0	3.03801	1.96371	5.05707	5.17332	7.85484	17.3434	12.584	0.981855	8.84953	2.94984
2012	1.04957	3.17455	1.05818	2.09914	5.40583	3.48763	6.29741	13.9046	18.3651	0	0	5.89968
2012	0	0	1.05818	0	0	2.67288	10.8004	23.8472	17.0643	0.981855	8.84953	12.0944
2012	0	0	0	1.01458	2.61282	3.39947	6.0875	13.4412	14.5974	3.04375	27.4335	12.0944
2012	0	0	0	2.94556	7.5856	5.14135	2.94556	6.50379	10.382	0	0	15.2408
2012	0	0	0.989913	2.02917	5.22564	5.11326	5.07292	11.201	7.34687	2.02917	18.289	9.04618
2012	0.981855	2.96974	1.97983	0.981855	2.52853	4.27041	1.96371	4.33586	6.62423	0.981855	8.84953	14.9459
2012	0.981855	2.96974	1.97983	1.96371	5.05707	4.27041	1.96371	4.33586	2.89057	1.96371	17.6991	11.8977
2012	0	0	0.989913	2.02917	5.22564	5.9561	0	0	5.0585	1.01458	9.14451	14.8475
2012	0	0	2.04582	2.94556	7.5856	4.27041	4.90927	10.8396	6.60014	1.96371	17.6991	11.996
2012	2.02917	6.13746	3.03573	0	0	3.37138	4.05833	8.96077	8.04542	1.01458	9.14451	11.8977
2012	0.981855	2.96974	3.03573	0.981855	2.52853	1.68569	1.96371	4.33586	6.60014	0.981855	8.84953	5.99801
2013	0	0	0.989913	0.981855	2.52853	2.61884	2.94556	6.50379	3.61321	0	0	2.94984
2013	0	0	0.989913	1.08705	2.79945	3.46168	0	0	7.94907	0	0	0
2013	0.981855	2.96974	0.989913	1.96371	5.05707	5.23166	7.85484	17.3434	7.2746	0	0	3.04817
2013	0	0	1.97983	3.04375	7.83845	4.29851	2.02917	4.48039	8.71989	1.01458	9.14451	5.99801
2013	0.981855	2.96974	2.01282	0	0	2.61282	1.96371	4.33586	4.43221	0.981855	8.84953	21.2389
2013	1.01458	3.06873	3.00274	0	0	0.842844	2.02917	4.48039	8.71989	5.07292	45.7225	18.1907
2013	0.981855	2.96974	3.00274	0.981855	2.52853	1.68569	7.85484	17.3434	9.44253	0	0	18.1907
2013	0.981855	2.96974	1.97983	0.981855	2.52853	4.29851	2.94556	6.50379	13.1762	0.981855	8.84953	15.1425
2013	0	0	0.989913	3.04375	7.83845	5.14135	7.10208	15.6813	11.7309	4.05833	36.578	15.1425
2013	0	0	0	1.96371	5.05707	6.04039	5.89113	13.0076	11.8032	0	0	15.2408
2013	0	0	0	2.02917	5.22564	3.42757	3.04375	6.72058	7.29869	1.01458	9.14451	8.94785
2013	0	0	0	0	0	1.74188	0.981855	2.16793	5.85341	1.96371	17.6991	14.8475
2014	0	0	1.09597	0	0	5.5989	3.92742	8.67171	5.21335	1.96371	17.6991	15.0653
2014	1.08705	3.28792	2.08589	6.52232	16.7967	7.28458	2.17411	4.80041	4.49071	1.08705	9.79769	9.16558
2014	0.981855	2.96974	5.15462	1.96371	5.05707	7.28458	0	0	3.84033	0	0	6.31407
2014	3.04375	9.20619	4.05864	0	0	5.05707	3.04375	6.72058	2.24019	1.01458	9.14451	8.94785
2014	0	0	3.06873	3.92742	10.1141	3.37138	0	0	2.98692	1.96371	17.6991	11.996
2014	0	0	0	0	0	3.37138	1.01458	2.24019	3.6373	1.01458	9.14451	14.8475
2014	0	0	0.989913	0	0	0.842844	3.92742	8.67171	6.52787	1.96371	17.6991	8.94785
2014	0.981855	2.96974	0.989913	0.981855	2.52853	0.842844	3.92742	8.67171	12.5017	0	0	15.0442
2014	0	0	2.96974	0	0	2.52853	9.13125	20.1617	12.5017	3.04375	27.4335	17.994
2014	1.96371	5.93948	1.97983	1.96371	5.05707	3.42757	3.92742	8.67171	11.8513	2.94556	26.5486	17.994
2014	0	0	1.97983	2.02917	5.22564	5.9561	3.04375	6.72058	6.57605	0	0	14.7492
2014	0	0	0.989913	2.94556	7.5856	8.48463	1.96371	4.33586	13.8025	1.96371	17.6991	26.5486
2015	0.981855	2.96974	0.989913	4.90927	12.6427	7.67591	13.746	30.351	14.7626	6.87298	61.9467	29.8145
2015	0	0	1.97983	1.08705	2.79945	6.83306	4.34821	9.60083	16.2078	1.08705	9.79769	32.7643
2015	0.981855	2.96974	0.989913	1.96371	5.05707	5.23166	3.92742	8.67171	6.83758	2.94556	26.5486	12.1154
2015	0	0	2.96974	3.04375	7.83845	5.14135	1.01458	2.24019	7.25052	0	0	11.7994
2015	1.96371	5.93948	1.97983	0.981855	2.52853	4.3266	4.90927	10.8396	9.58706	0.981855	8.84953	12.0944
2015	0	0	1.97983	1.01458	2.61282	1.71378	7.10208	15.6813	8.84033	3.04375	27.4335	12.0944
2015	0	0	0	0	0	0.870939	0	0	6.6724	0	0	12.0944
2015	0	0	0	0	0	2.61282	1.96371	4.33586	6.6724	0.981855	8.84953	5.99801
2015	0	0	0.989913	3.04375	7.83845	2.61282	7.10208	15.6813	9.56297	1.01458	9.14451	17.7974
2015	0.981855	2.96974	0.989913	0	0	2.61282	3.92742	8.67171	10.3579	3.92742	35.3981	14.8475
2015	0	0	0.989913	0	0	1.68569	3.04375	6.72058	7.29869	0	0	14.7492
2015	0	0	0	1.96371	5.05707	1.68569	2.94556	6.50379	6.57605	0.981855	8.84953	5.89968
2016	0	0	0	0	0	1.68569	2.94556	6.50379	5.88082	0.981855	8.84953	5.89968
2016	0	0	0.989913	0	0	1.68569	2.09914	4.63488	7.3261	0	0	5.89968
2016	0.981855	2.96974	2.01282	1.96371	5.05707	4.29851	4.90927	10.8396	11.132	0.981855	8.84953	12.0944
2016	1.01458	3.06873	2.01282	3.04375	7.83845	4.29851	8.11667	17.9215	11.755	3.04375	27.4335	20.9439
2016	0	0	2.04582	0	0	6.09658	2.94556	6.50379	8.88851	2.94556	26.5486	21.0422
2016	1.01458	3.06873	1.02291	4.05833	10.4513	4.3266	1.01458	2.24019	5.08259	1.01458	9.14451	17.7974
2016	0	0	1.02291	0.981855	2.52853	6.01229	2.94556	6.50379	5.08259	1.96371	17.6991	8.94785
2016	0	0	1.02291	1.96371	5.05707	2.52853	2.94556	6.50379	8.81624	0	0	15.0442
2016	1.01458	3.06873	2.01282	0	0	2.52853	6.0875	13.4412	8.0936	3.04375	27.4335	17.994
2016	0.981855	2.96974	3.03573	0.981855	2.52853	3.45566	1.96371	4.33586	6.6724	2.94556	26.5486	24.0904
2016	1.01458	3.06873	3.00274	3.04375	7.83845	3.45566	1.01458	2.24019	4.35995	2.02917	18.289	23.7954
2016	0.981855	2.96974	3.01923	0	0	3.91923	2.94556	6.50379	4.37199	2.94556	26.5486	22.4188
